# Supplementary material for: Isolation, structural elucidation, and cytotoxic activity investigation of novel styryl-lactone derivatives fromGoniothalamus elegans:in vitroandin silicostudies
Source: Royal Society of Chemistry journal article supplement (doi:10.1039/d3ra02646a), 2023-01-01
Supplement: d3ra02646a1.pdf [file d3ra02646a1.pdf]

## Supporting information

### Isolation, structural elucidation, and cytotoxic activity investigation of novel styryl-lactone derivatives from *Goniothalamus elegans*: *in vitro* and *in silico* studies

Tan Khanh Nguyen<sup>a,1</sup> Linh Thuy Thi Tran<sup>b,1</sup>, Truong Tan Trung<sup>c</sup>, Phu Tran Vinh Pham<sup>d</sup>, Linh Thuy Khanh Nguyen<sup>b</sup>, Hoai Thi Nguyen<sup>b</sup>, Duc Viet Ho<sup>b,\*</sup>, Manh Hung Tran<sup>c,\*\*</sup>

<sup>a</sup> Scientific Management Department, Dong A University, Da Nang city 550000, Vietnam

<sup>b</sup> Faculty of Pharmacy, Hue University of Medicine and Pharmacy, Hue University, Hue, Vietnam

<sup>c</sup> Laboratory of Computation and Nanoscience (Lab\_CNS), Dong Nai Technology University, Dong Nai 76000, Vietnam

<sup>d</sup> Faculty of Medicine, Dong A University, Da Nang city 550000, Vietnam

<sup>e</sup> School of Medicine and Pharmacy, The University of Danang, Da Nang city 550000, Vietnam

\* Corresponding author: Faculty of Pharmacy, Hue University of Medicine and Pharmacy, Hue University, Hue, Vietnam. [orcid.org/0000-0002-7442-3925](https://orcid.org/0000-0002-7442-3925). Email: [hvietduc@hueuni.edu.vn](mailto:hvietduc@hueuni.edu.vn)

\*\* Corresponding author: School of Medicine and Pharmacy, The University of Danang, Da Nang city 550000, Vietnam. [orcid.org/0000-0003-3061-7952](https://orcid.org/0000-0003-3061-7952) Email: [tmhung@smp.udn.vn](mailto:tmhung@smp.udn.vn)

<sup>1</sup> Authors with equal contribution

#### Table of Contents

|                                               |    |
|-----------------------------------------------|----|
| A. Density-functional theory studies .....    | 2  |
| B. Molecular docking simulation.....          | 9  |
| C. Characterization data for compound 1 ..... | 10 |

## A. DFT Studies

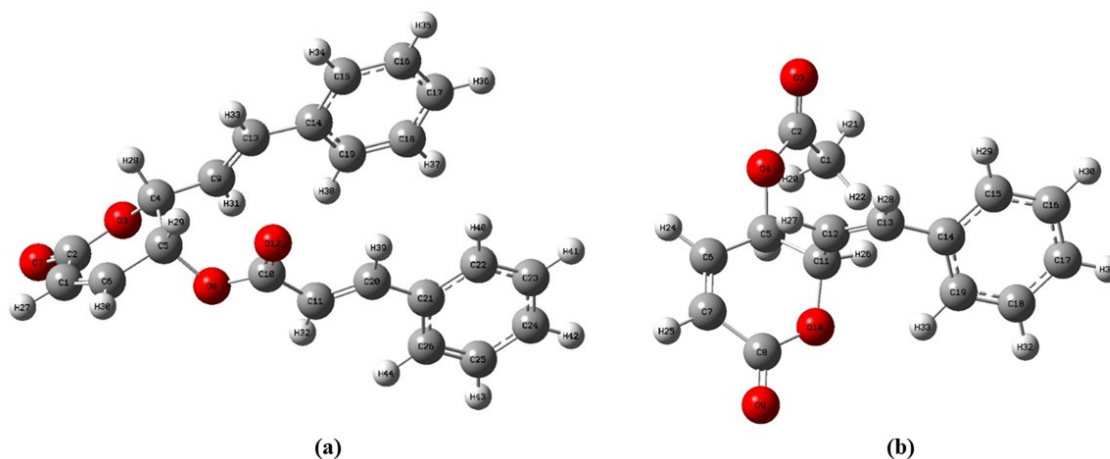

**S1.** Optimized geometry of molecular (a) compound (1), (b) compound (2) calculated by DFT/M052X level of calculations through 6-311++G(d,p) basis set

**S2.** Ground state electronic energy. thermodynamic parameters. dipole moment of investigated compounds in the gas phase using M052X/6-311++G(d,p) method.

| Parameter                                                         | Compounds |         |
|-------------------------------------------------------------------|-----------|---------|
|                                                                   | 1         | 2       |
| Ground state electronic energy. E (Hartree)                       | -1150.23  | -881.03 |
| Sum of electronic and thermal Enthalpies. H (Hartree/Particle)    | -1149.85  | -880.75 |
| Sum of electronic and thermal Free Energies. G (Hartree/Particle) | -1149.93  | -880.81 |
| Dipole moment (Debye)                                             | 5.04      | 2.47    |
| Polarizability $\alpha$ (a.u)                                     | 266.65    | 178.83  |

**S3.** Quantum descriptors of investigated compounds calculated by NBO at M052X/def2TZVPP level

| Compound properties           | Quantum description                             | Unit | Compounds |        |
|-------------------------------|-------------------------------------------------|------|-----------|--------|
|                               |                                                 |      | 1         | 2      |
| $E_{\text{HOMO}}$             | Energy of HOMO                                  | eV   | -7.856    | -8.227 |
| $E_{\text{LUMO}}$             | Energy of LUMO                                  | eV   | -1.277    | -0.865 |
| Energy gap ( $E_g$ )          | $E_g = E_{\text{LUMO}} - E_{\text{HOMO}}$       | eV   | 6.579     | 7.361  |
| Ionization potential ( $IP$ ) | $IP = -E_{\text{HOMO}}$                         | eV   | 7.856     | 8.227  |
| Electron affinity ( $EA$ )    | $EA = -E_{\text{LUMO}}$                         | eV   | 1.277     | 0.865  |
| Electronegativity ( $\chi$ )  | $\chi = -(E_{\text{LUMO}} + E_{\text{HOMO}})/2$ | eV   | 4.566     | 4.546  |
| Chemical hardness ( $\eta$ )  | $\eta = (E_{\text{LUMO}} - E_{\text{HOMO}})/2$  | eV   | 3.290     | 3.681  |

|                                     |                                                       |    |        |        |
|-------------------------------------|-------------------------------------------------------|----|--------|--------|
| Chemical potential ( $\mu$ )        | $\mu = -\chi = (E_{\text{LUMO}} + E_{\text{HOMO}})/2$ | eV | -4.566 | -4.546 |
| Chemical softness (S)               | $S = 1/2\eta$                                         | eV | 0.152  | 0.136  |
| Electrophilicity index ( $\omega$ ) | $\omega = \mu^2/2\eta$                                | eV | 3.169  | 2.807  |

#### S4. Calculated geometric parameters of compound 1

| Parameters | Bond lengths<br>(Å) | Parameters | Bond angles<br>(°) | Parameters   | Dihedral angle |
|------------|---------------------|------------|--------------------|--------------|----------------|
|            |                     |            |                    |              | (°)            |
| R(1,2)     | 1.4825              | A(2,1,6)   | 122.0616           | D(6,1,2,3)   | -7.8013        |
| R(1,6)     | 1.3277              | A(2,1,27)  | 114.6508           | D(6,1,2,7)   | 168.4746       |
| R(1,27)    | 1.0801              | A(6,1,27)  | 123.0325           | D(27,1,2,3)  | 177.838        |
| R(2,3)     | 1.35                | A(1,2,3)   | 117.3456           | D(27,1,2,7)  | -5.8861        |
| R(2,7)     | 1.1978              | A(1,2,7)   | 122.3783           | D(2,1,6,5)   | 6.4241         |
| R(3,4)     | 1.4367              | A(3,2,7)   | 120.1711           | D(2,1,6,30)  | -172.9151      |
| R(4,5)     | 1.5312              | A(2,3,4)   | 120.0304           | D(27,1,6,5)  | -179.6911      |
| R(4,9)     | 1.4983              | A(3,4,5)   | 112.9375           | D(27,1,6,30) | 0.9697         |
| R(4,28)    | 1.0926              | A(3,4,9)   | 106.3784           | D(1,2,3,4)   | -18.6226       |
| R(5,6)     | 1.494               | A(3,4,28)  | 108.0319           | D(7,2,3,4)   | 165.0152       |
| R(5,8)     | 1.4351              | A(5,4,9)   | 110.6028           | D(2,3,4,5)   | 43.2819        |
| R(5,29)    | 1.0888              | A(5,4,28)  | 107.4607           | D(2,3,4,9)   | 164.7913       |
| R(6,30)    | 1.0824              | A(9,4,28)  | 111.4574           | D(2,3,4,28)  | -75.43         |
| R(8,10)    | 1.3648              | A(4,5,6)   | 111.7588           | D(3,4,5,6)   | -41.2766       |
| R(9,13)    | 1.3302              | A(4,5,8)   | 109.8011           | D(3,4,5,8)   | 79.6706        |
| R(9,31)    | 1.0823              | A(4,5,29)  | 107.7409           | D(3,4,5,29)  | -162.8195      |
| R(10,11)   | 1.47                | A(6,5,8)   | 108.8925           | D(9,4,5,6)   | -160.3677      |
| R(10,12)   | 1.2023              | A(6,5,29)  | 110.4752           | D(9,4,5,8)   | -39.4206       |
| R(11,20)   | 1.3368              | A(8,5,29)  | 108.1015           | D(9,4,5,29)  | 78.0894        |
| R(11,32)   | 1.0802              | A(1,6,5)   | 120.65             | D(28,4,5,6)  | 77.7667        |
| R(13,14)   | 1.4702              | A(1,6,30)  | 121.4763           | D(28,4,5,8)  | -161.2862      |
| R(13,33)   | 1.0866              | A(5,6,30)  | 117.8705           | D(28,4,5,29) | -43.7762       |
| R(14,15)   | 1.3961              | A(5,8,10)  | 115.8586           | D(3,4,9,13)  | 156.5709       |
| R(14,19)   | 1.3992              | A(4,9,13)  | 123.0228           | D(3,4,9,31)  | -29.6277       |
| R(15,16)   | 1.3891              | A(4,9,31)  | 114.293            | D(5,4,9,13)  | -80.4417       |

|          |        |             |          |                |           |
|----------|--------|-------------|----------|----------------|-----------|
| R(15,34) | 1.0826 | A(13,9,31)  | 122.3806 | D(5,4,9,31)    | 93.3596   |
| R(16,17) | 1.3885 | A(8,10,11)  | 110.3784 | D(28,4,9,13)   | 39.0426   |
| R(16,35) | 1.0814 | A(8,10,12)  | 123.2459 | D(28,4,9,31)   | -147.156  |
| R(17,18) | 1.3923 | A(11,10,12) | 126.3433 | D(4,5,6,1)     | 18.1832   |
| R(17,36) | 1.0815 | A(10,11,20) | 118.3698 | D(4,5,6,30)    | -162.4543 |
| R(18,19) | 1.3856 | A(10,11,32) | 117.0889 | D(8,5,6,1)     | -103.2905 |
| R(18,37) | 1.0816 | A(20,11,32) | 124.1932 | D(8,5,6,30)    | 76.072    |
| R(19,38) | 1.0809 | A(9,13,14)  | 126.2482 | D(29,5,6,1)    | 138.1335  |
| R(20,21) | 1.4628 | A(9,13,33)  | 118.6325 | D(29,5,6,30)   | -42.504   |
| R(20,39) | 1.0851 | A(14,13,33) | 115.0428 | D(4,5,8,10)    | 97.4764   |
| R(21,22) | 1.3969 | A(13,14,15) | 118.7149 | D(6,5,8,10)    | -139.8641 |
| R(21,26) | 1.3987 | A(13,14,19) | 122.8163 | D(29,5,8,10)   | -19.8086  |
| R(22,23) | 1.3881 | A(15,14,19) | 118.4381 | D(5,8,10,11)   | -157.42   |
| R(22,40) | 1.0824 | A(14,15,16) | 120.9822 | D(5,8,10,12)   | 20.6287   |
| R(23,24) | 1.3888 | A(14,15,34) | 119.1795 | D(4,9,13,14)   | 170.227   |
| R(23,41) | 1.0813 | A(16,15,34) | 119.8381 | D(4,9,13,33)   | -6.4231   |
| R(24,25) | 1.3927 | A(15,16,17) | 119.9933 | D(31,9,13,14)  | -3.0809   |
| R(24,42) | 1.0813 | A(15,16,35) | 119.8057 | D(31,9,13,33)  | -179.7309 |
| R(25,26) | 1.3851 | A(17,16,35) | 120.2009 | D(8,10,11,20)  | 163.1153  |
| R(25,43) | 1.0813 | A(16,17,18) | 119.6049 | D(8,10,11,32)  | -10.3981  |
| R(26,44) | 1.0812 | A(16,17,36) | 120.2507 | D(12,10,11,20) | -14.8586  |
|          |        | A(18,17,36) | 120.144  | D(12,10,11,32) | 171.628   |
|          |        | A(17,18,19) | 120.324  | D(10,11,20,21) | -174.0705 |
|          |        | A(17,18,37) | 120.0832 | D(10,11,20,39) | 3.1154    |
|          |        | A(19,18,37) | 119.5857 | D(32,11,20,21) | -1.0547   |
|          |        | A(14,19,18) | 120.6552 | D(32,11,20,39) | 176.1312  |
|          |        | A(14,19,38) | 120.2091 | D(9,13,14,15)  | 176.4519  |
|          |        | A(18,19,38) | 119.1261 | D(9,13,14,19)  | -5.5959   |
|          |        | A(11,20,21) | 126.9302 | D(33,13,14,15) | -6.7934   |
|          |        | A(11,20,39) | 116.7972 | D(33,13,14,19) | 171.1589  |
|          |        | A(21,20,39) | 116.2176 | D(13,14,15,16) | 178.5979  |
|          |        | A(20,21,22) | 118.2326 | D(13,14,15,34) | -1.2526   |
|          |        | A(20,21,26) | 122.9045 | D(19,14,15,16) | 0.5549    |

|  |  |             |          |                |           |
|--|--|-------------|----------|----------------|-----------|
|  |  | A(22,21,26) | 118.8563 | D(19,14,15,34) | -179.2955 |
|  |  | A(21,22,23) | 120.7367 | D(13,14,19,18) | -178.4777 |
|  |  | A(21,22,40) | 119.097  | D(13,14,19,38) | 0.3823    |
|  |  | A(23,22,40) | 120.1598 | D(15,14,19,18) | -0.5201   |
|  |  | A(22,23,24) | 119.8942 | D(15,14,19,38) | 178.34    |
|  |  | A(22,23,41) | 119.9211 | D(14,15,16,17) | -0.2601   |
|  |  | A(24,23,41) | 120.1846 | D(14,15,16,35) | 179.84    |
|  |  | A(23,24,25) | 119.8722 | D(34,15,16,17) | 179.5894  |
|  |  | A(23,24,42) | 120.1395 | D(34,15,16,35) | -0.3105   |
|  |  | A(25,24,42) | 119.9873 | D(15,16,17,18) | -0.0804   |
|  |  | A(24,25,26) | 120.2248 | D(15,16,17,36) | -179.8478 |
|  |  | A(24,25,43) | 119.9857 | D(35,16,17,18) | 179.8191  |
|  |  | A(26,25,43) | 119.7889 | D(35,16,17,36) | 0.0517    |
|  |  | A(21,26,25) | 120.4132 | D(16,17,18,19) | 0.1135    |
|  |  | A(21,26,44) | 120.0397 | D(16,17,18,37) | -178.908  |
|  |  | A(25,26,44) | 119.5434 | D(36,17,18,19) | 179.8812  |
|  |  |             |          | D(36,17,18,37) | 0.8597    |
|  |  |             |          | D(17,18,19,14) | 0.1925    |
|  |  |             |          | D(17,18,19,38) | -178.6798 |
|  |  |             |          | D(37,18,19,14) | 179.2188  |
|  |  |             |          | D(37,18,19,38) | 0.3465    |
|  |  |             |          | D(11,20,21,22) | 168.1925  |
|  |  |             |          | D(11,20,21,26) | -10.8591  |
|  |  |             |          | D(39,20,21,22) | -9.0076   |
|  |  |             |          | D(39,20,21,26) | 171.9409  |
|  |  |             |          | D(20,21,22,23) | -178.5076 |
|  |  |             |          | D(20,21,22,40) | 0.5651    |
|  |  |             |          | D(26,21,22,23) | 0.5832    |
|  |  |             |          | D(26,21,22,40) | 179.6559  |
|  |  |             |          | D(20,21,26,25) | 178.5686  |
|  |  |             |          | D(20,21,26,44) | -2.1407   |
|  |  |             |          | D(22,21,26,25) | -0.4773   |
|  |  |             |          | D(22,21,26,44) | 178.8134  |

|  |  |  |  |                |           |
|--|--|--|--|----------------|-----------|
|  |  |  |  | D(21,22,23,24) | -0.2792   |
|  |  |  |  | D(21,22,23,41) | 179.8243  |
|  |  |  |  | D(40,22,23,24) | -179.3421 |
|  |  |  |  | D(40,22,23,41) | 0.7615    |
|  |  |  |  | D(22,23,24,25) | -0.1379   |
|  |  |  |  | D(22,23,24,42) | -179.7901 |
|  |  |  |  | D(41,23,24,25) | 179.7582  |
|  |  |  |  | D(41,23,24,42) | 0.1061    |
|  |  |  |  | D(23,24,25,26) | 0.2422    |
|  |  |  |  | D(23,24,25,43) | -179.4653 |
|  |  |  |  | D(42,24,25,26) | 179.8948  |
|  |  |  |  | D(42,24,25,43) | 0.1874    |
|  |  |  |  | D(24,25,26,21) | 0.0697    |
|  |  |  |  | D(24,25,26,44) | -179.2244 |
|  |  |  |  | D(43,25,26,21) | 179.7778  |
|  |  |  |  | D(43,25,26,44) | 0.4836    |

S5. Calculated geometric parameters of compound 2

| Parameters | Bond lengths | Parameters  | Bond angles | Parameters    | Dihedral angle |
|------------|--------------|-------------|-------------|---------------|----------------|
|            | (Å)          |             | (°)         |               | (°)            |
| R(1,2)     | 1.5082       | A(2,1,20)   | 110.2621    | D(20,1,2,3)   | -113.9383      |
| R(1,20)    | 1.0904       | A(2,1,21)   | 107.1878    | D(20,1,2,4)   | 63.7991        |
| R(1,21)    | 1.0844       | A(2,1,22)   | 112.1796    | D(21,1,2,3)   | 4.8347         |
| R(1,22)    | 1.0883       | A(20,1,21)  | 109.2112    | D(21,1,2,4)   | -177.4278      |
| R(2,3)     | 1.1927       | A(20,1,22)  | 108.4659    | D(22,1,2,3)   | 125.0569       |
| R(2,4)     | 1.3641       | A(21,1,22)  | 109.4957    | D(22,1,2,4)   | -57.2057       |
| R(4,5)     | 1.4254       | A(1,2,3)    | 123.6197    | D(1,2,4,5)    | 9.173          |
| R(5,6)     | 1.4988       | A(1,2,4)    | 118.1046    | D(3,2,4,5)    | -172.9656      |
| R(5,11)    | 1.5297       | A(3,2,4)    | 118.2384    | D(2,4,5,6)    | -155.4448      |
| R(5,23)    | 1.0919       | A(2,4,5)    | 122.4239    | D(2,4,5,11)   | 85.2297        |
| R(6,7)     | 1.3275       | A(4,5,6)    | 106.9915    | D(2,4,5,23)   | -36.5241       |
| R(6,24)    | 1.0823       | A(4,5,11)   | 110.7263    | D(4,5,6,7)    | -149.2566      |
| R(7,8)     | 1.4826       | A(4,5,23)   | 110.8562    | D(4,5,6,24)   | 31.1817        |
| R(7,25)    | 1.0796       | A(6,5,11)   | 109.5516    | D(11,5,6,7)   | -29.176        |
| R(8,9)     | 1.1961       | A(6,5,23)   | 109.1562    | D(11,5,6,24)  | 151.2624       |
| R(8,10)    | 1.3577       | A(11,5,23)  | 109.5095    | D(23,5,6,7)   | 90.7273        |
| R(10,11)   | 1.45         | A(5,6,7)    | 120.3286    | D(23,5,6,24)  | -88.8344       |
| R(11,12)   | 1.4993       | A(5,6,24)   | 117.1301    | D(4,5,11,10)  | 171.2582       |
| R(11,26)   | 1.0864       | A(7,6,24)   | 122.5398    | D(4,5,11,12)  | 46.2146        |
| R(12,13)   | 1.334        | A(6,7,8)    | 120.9537    | D(4,5,11,26)  | -76.1279       |
| R(12,27)   | 1.0824       | A(6,7,25)   | 123.3986    | D(6,5,11,10)  | 53.4866        |
| R(13,14)   | 1.4744       | A(8,7,25)   | 115.5404    | D(6,5,11,12)  | -71.557        |
| R(13,28)   | 1.0848       | A(7,8,9)    | 123.1897    | D(6,5,11,26)  | 166.1004       |
| R(14,15)   | 1.398        | A(7,8,10)   | 116.7413    | D(23,5,11,10) | -66.2002       |
| R(14,19)   | 1.3978       | A(9,8,10)   | 119.9775    | D(23,5,11,12) | 168.7562       |
| R(15,16)   | 1.3867       | A(8,10,11)  | 119.3915    | D(23,5,11,26) | 46.4137        |
| R(15,29)   | 1.0826       | A(5,11,10)  | 108.2311    | D(5,6,7,8)    | -2.9112        |
| R(16,17)   | 1.391        | A(5,11,12)  | 112.2991    | D(5,6,7,25)   | -178.9752      |
| R(16,30)   | 1.0813       | A(5,11,26)  | 110.4813    | D(24,6,7,8)   | 176.6261       |
| R(17,18)   | 1.3891       | A(10,11,12) | 112.6985    | D(24,6,7,25)  | 0.5621         |
| R(17,31)   | 1.0813       | A(10,11,26) | 103.4539    | D(6,7,8,9)    | -166.9707      |
| R(18,19)   | 1.3898       | A(12,11,26) | 109.3244    | D(6,7,8,10)   | 9.5426         |
| R(18,32)   | 1.0814       | A(11,12,13) | 123.9727    | D(25,7,8,9)   | 9.3879         |
| R(19,33)   | 1.0817       | A(11,12,27) | 117.0535    | D(25,7,8,10)  | -174.0988      |
|            |              | A(13,12,27) | 118.8887    | D(7,8,10,11)  | 20.0595        |
|            |              | A(12,13,14) | 127.0425    | D(9,8,10,11)  | -163.3089      |
|            |              | A(12,13,28) | 117.5288    | D(8,10,11,5)  | -51.6235       |
|            |              | A(14,13,28) | 115.4055    | D(8,10,11,12) | 73.1832        |

|  |             |          |                |           |
|--|-------------|----------|----------------|-----------|
|  | A(13,14,15) | 118.8199 | D(8,10,11,26)  | -168.855  |
|  | A(13,14,19) | 122.2391 | D(5,11,12,13)  | -143.9002 |
|  | A(15,14,19) | 118.9261 | D(5,11,12,27)  | 32.6978   |
|  | A(14,15,16) | 120.6636 | D(10,11,12,13) | 93.5476   |
|  | A(14,15,29) | 119.2963 | D(10,11,12,27) | -89.8544  |
|  | A(16,15,29) | 120.0355 | D(26,11,12,13) | -20.9044  |
|  | A(15,16,17) | 120.0182 | D(26,11,12,27) | 155.6936  |
|  | A(15,16,30) | 119.8632 | D(11,12,13,14) | -3.1779   |
|  | A(17,16,30) | 120.1176 | D(11,12,13,28) | 174.9768  |
|  | A(16,17,18) | 119.7767 | D(27,12,13,14) | -179.7175 |
|  | A(16,17,31) | 120.0916 | D(27,12,13,28) | -1.5627   |
|  | A(18,17,31) | 120.1261 | D(12,13,14,15) | 139.3809  |
|  | A(17,18,19) | 120.3302 | D(12,13,14,19) | -42.0393  |
|  | A(17,18,32) | 120.1077 | D(28,13,14,15) | -38.8076  |
|  | A(19,18,32) | 119.5569 | D(28,13,14,19) | 139.7722  |
|  | A(14,19,18) | 120.256  | D(13,14,15,16) | -179.3475 |
|  | A(14,19,33) | 119.6815 | D(13,14,15,29) | -0.1281   |
|  | A(18,19,33) | 120.035  | D(19,14,15,16) | 2.025     |
|  |             |          | D(19,14,15,29) | -178.7556 |
|  |             |          | D(13,14,19,18) | 179.771   |
|  |             |          | D(13,14,19,33) | -2.1382   |
|  |             |          | D(15,14,19,18) | -1.6507   |
|  |             |          | D(15,14,19,33) | 176.4401  |
|  |             |          | D(14,15,16,17) | -1.0512   |
|  |             |          | D(14,15,16,30) | 179.3142  |
|  |             |          | D(29,15,16,17) | 179.7351  |
|  |             |          | D(29,15,16,30) | 0.1005    |
|  |             |          | D(15,16,17,18) | -0.3192   |
|  |             |          | D(15,16,17,31) | -179.4575 |
|  |             |          | D(30,16,17,18) | 179.3145  |
|  |             |          | D(30,16,17,31) | 0.1761    |
|  |             |          | D(16,17,18,19) | 0.6867    |
|  |             |          | D(16,17,18,32) | -178.4769 |
|  |             |          | D(31,17,18,19) | 179.8248  |
|  |             |          | D(31,17,18,32) | 0.6611    |
|  |             |          | D(17,18,19,14) | 0.3117    |
|  |             |          | D(17,18,19,33) | -177.7722 |
|  |             |          | D(32,18,19,14) | 179.48    |
|  |             |          | D(32,18,19,33) | 1.396     |



## B. Molecular docking analysis

S6. Binding energy of compounds towards EGFR and HER2

| Compound                  | EGFR (kcal/mol) | HER2 (kcal/mol) |
|---------------------------|-----------------|-----------------|
| 1                         | -8.6            | -8.7            |
| 2                         | -6.4            | -6.9            |
| Osimertinib <sup>a)</sup> | -8.1            | -7.9            |

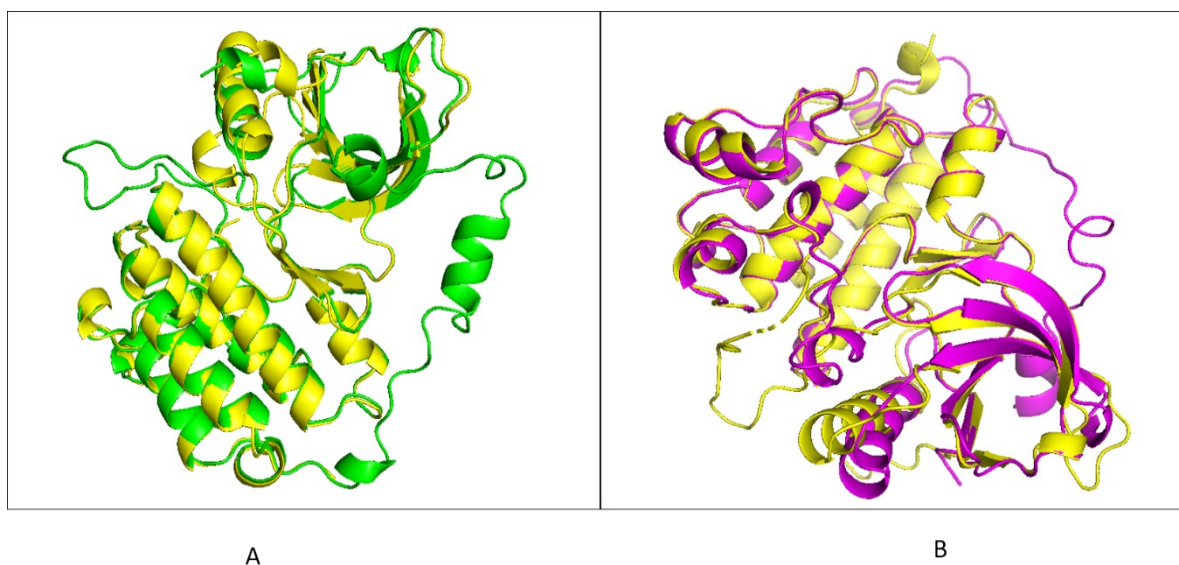

S6. Validation structure between PDB database (yellow) and AlphaFold predicted (green and purple) (A) EGFR (B) HER-2

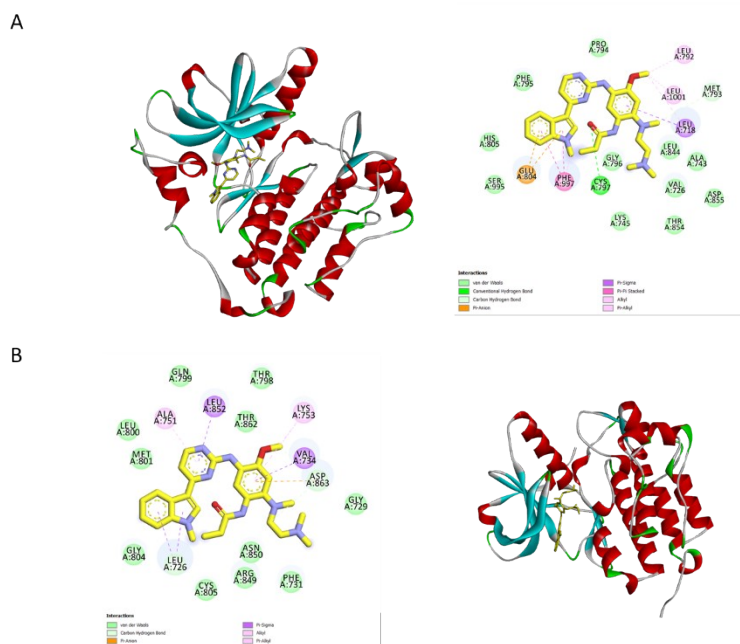

S7. 3D and 2D interaction between Osimertinib and protein (A) EGFR (B) HER-2

### C. Characterization data for compound 1

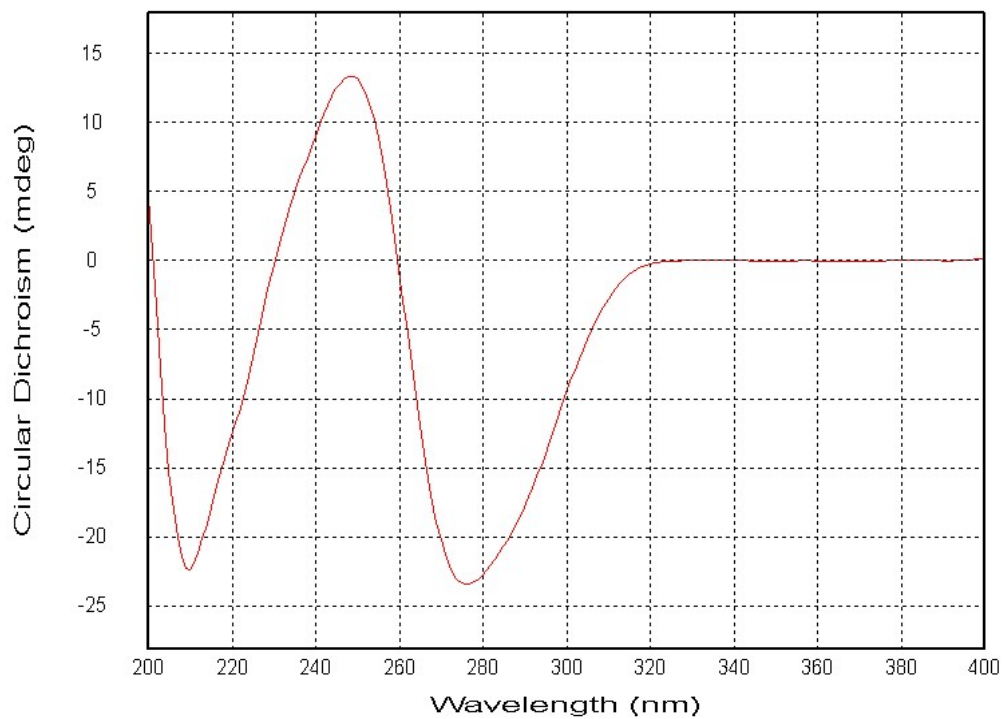

S8. CD spectrum of compound 1

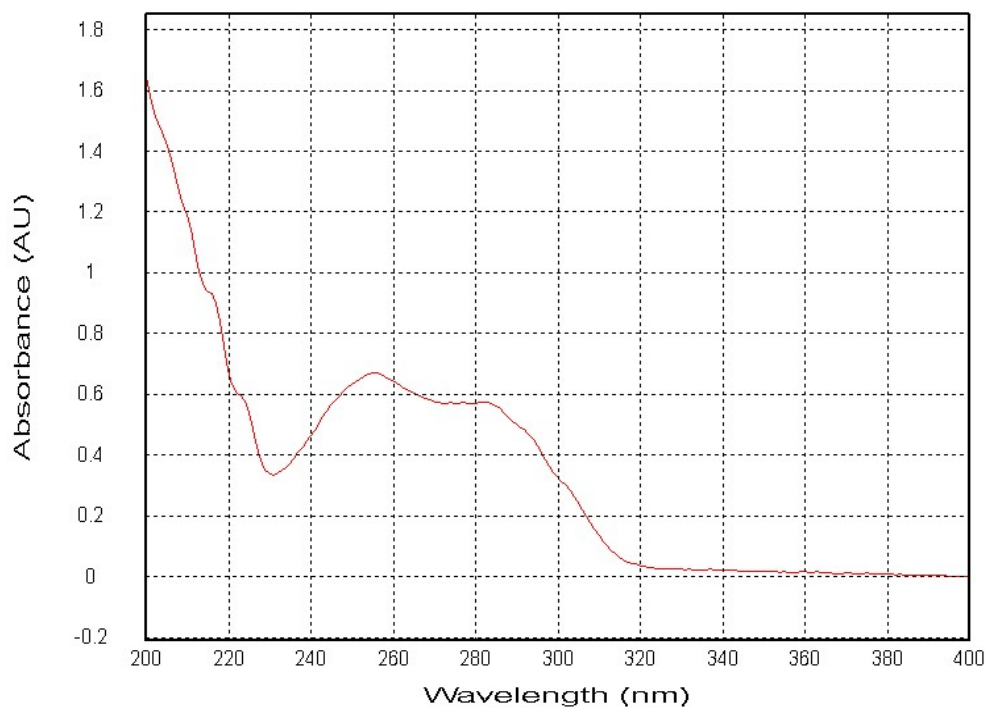

S9. UV Spectrum of compound 1

MS spectra

Method: +IDA TOF MS/MS

Date: 2022.08.11

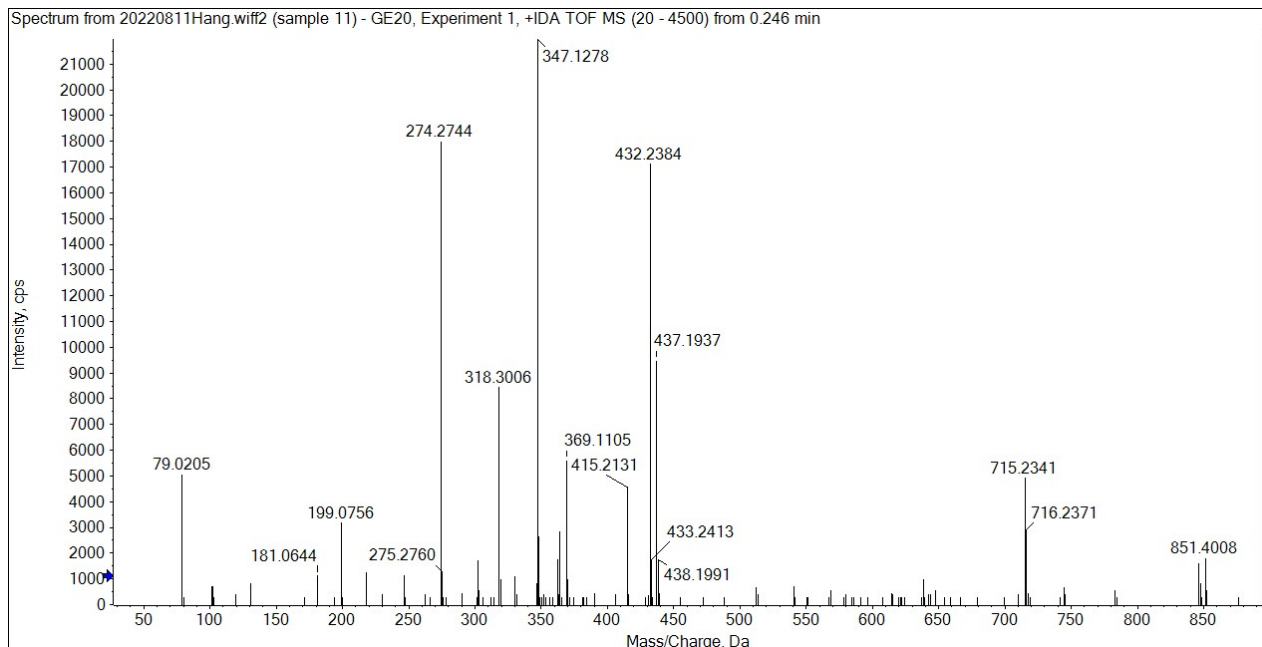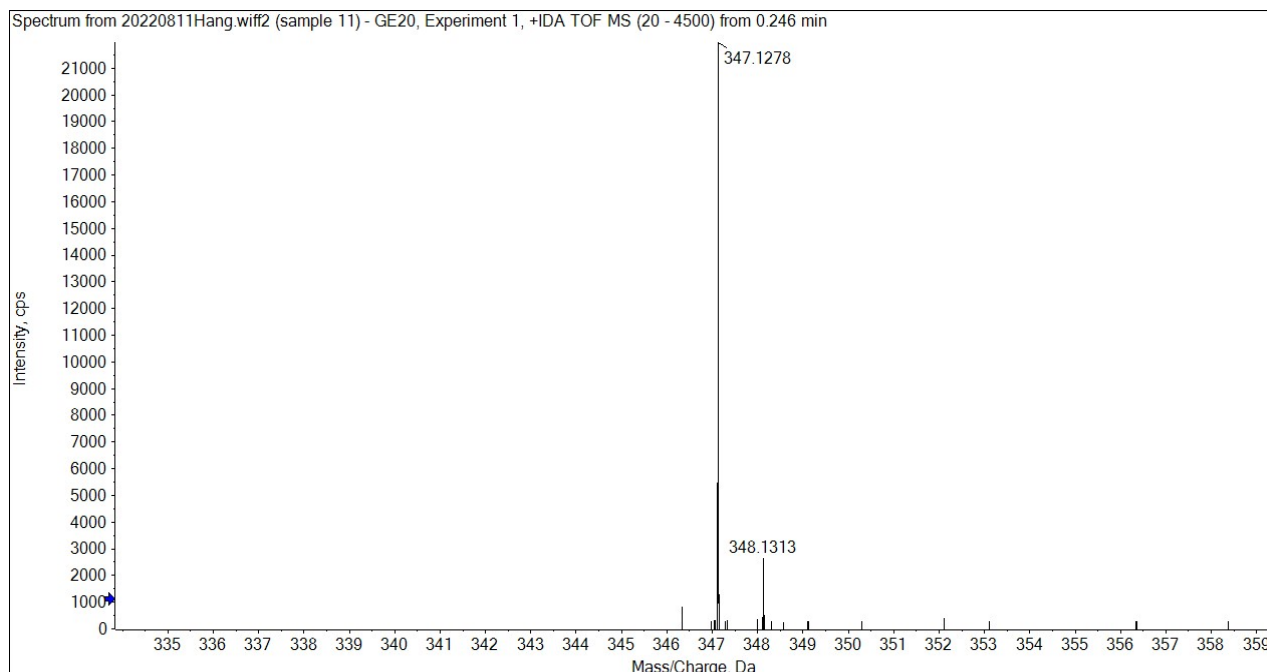

| Hit | Formula  | m/z       | RDB  | ppm | MS Rank | MSMS ppm | MSMS Rank | Found |
|-----|----------|-----------|------|-----|---------|----------|-----------|-------|
| 1   | C22H18O4 | 347.12779 | 14.0 | 0.2 | 1       |          |           | NA/NA |

S10. MS spectrum of compound 1

GE20-CDCl3-1H

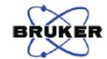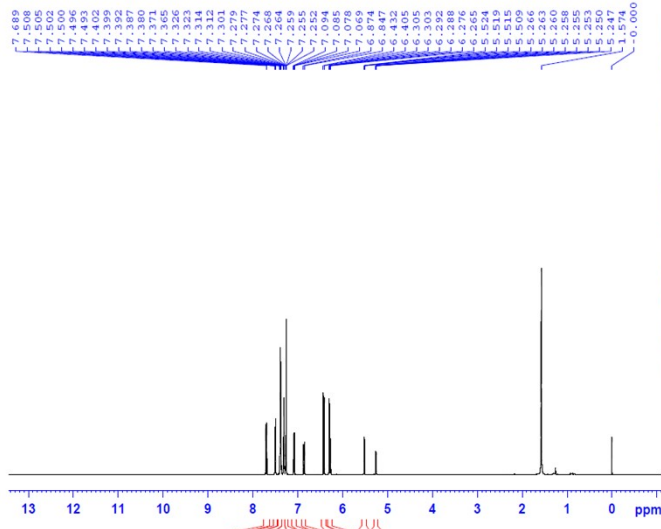

GE20-CDCl3-1H

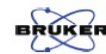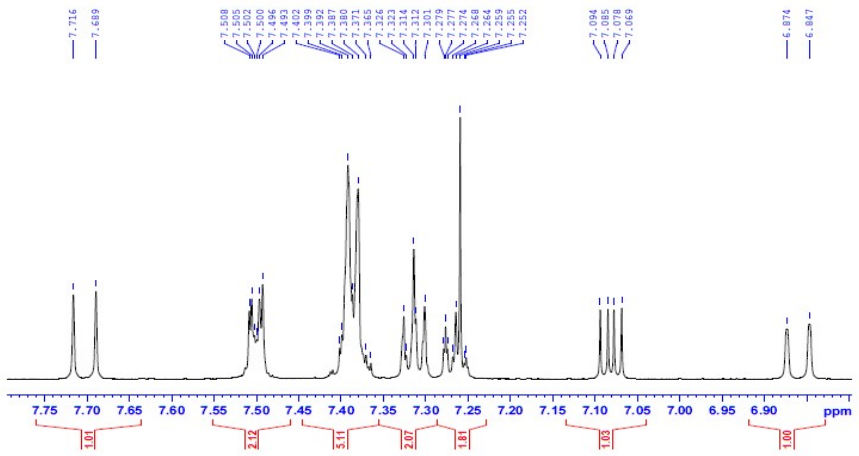

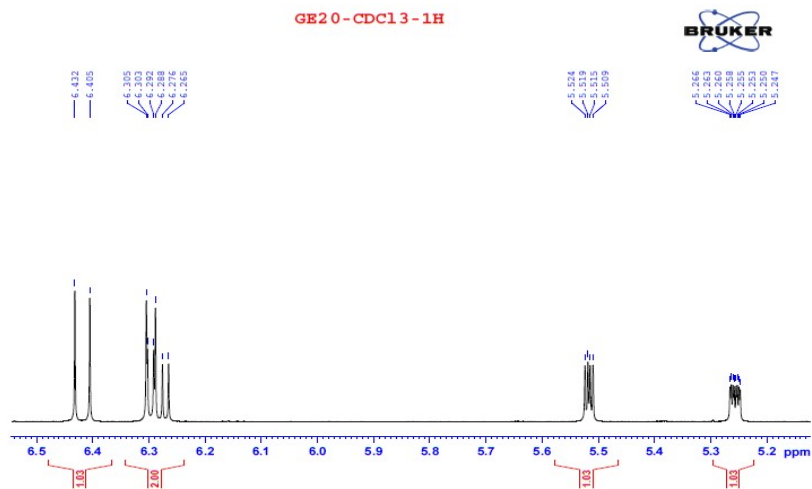

S11.  $^1\text{H}$  - NMR spectrum of compound 1

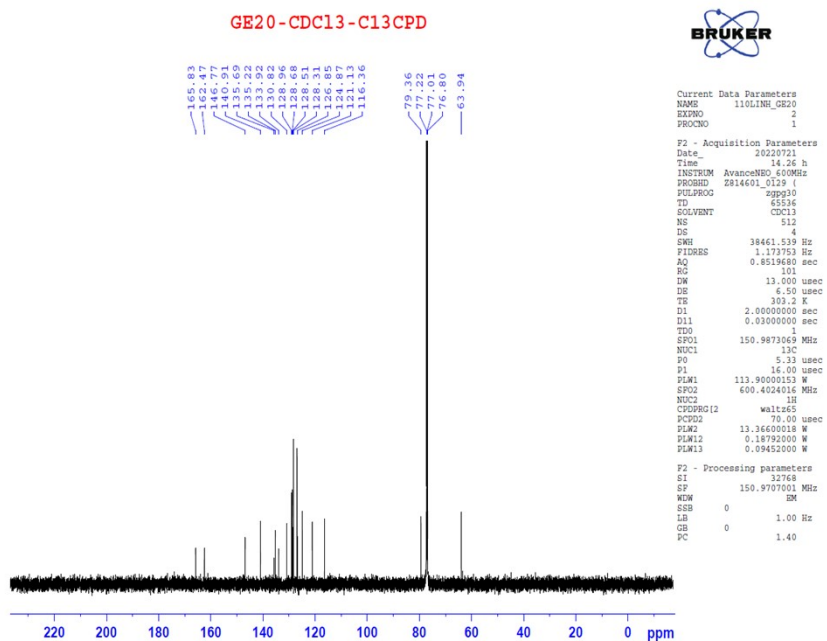

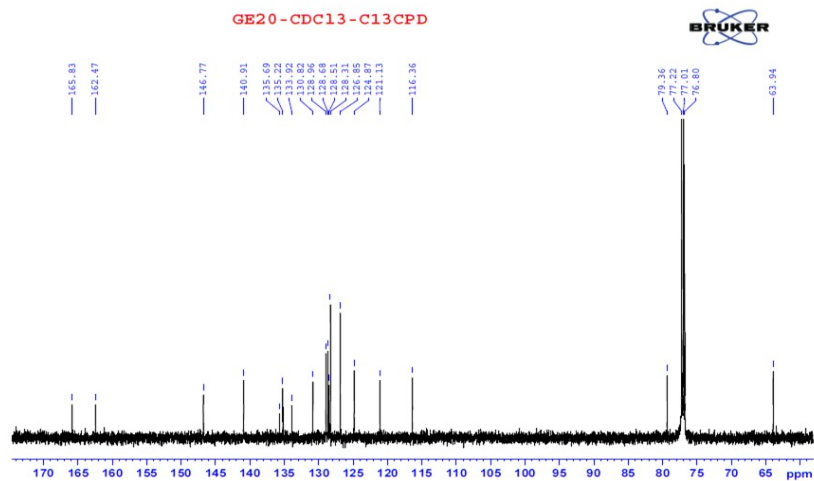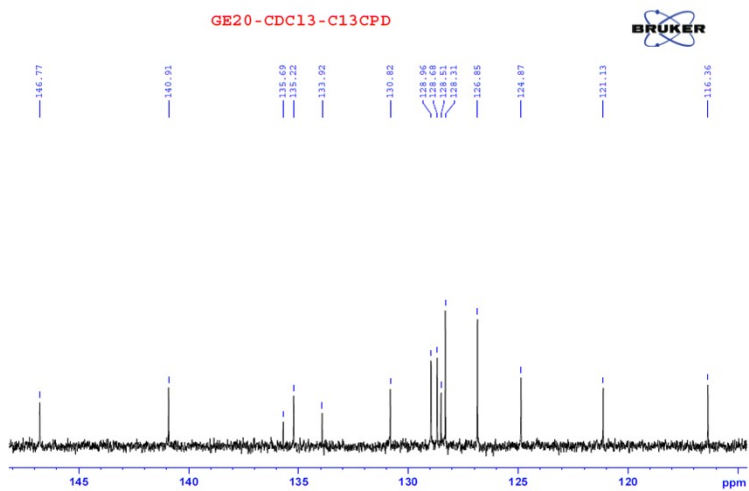

S12.  $^{13}\text{C}$  - NMR spectrum of compound 1

GE20 - CDC13 - COSYGP

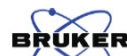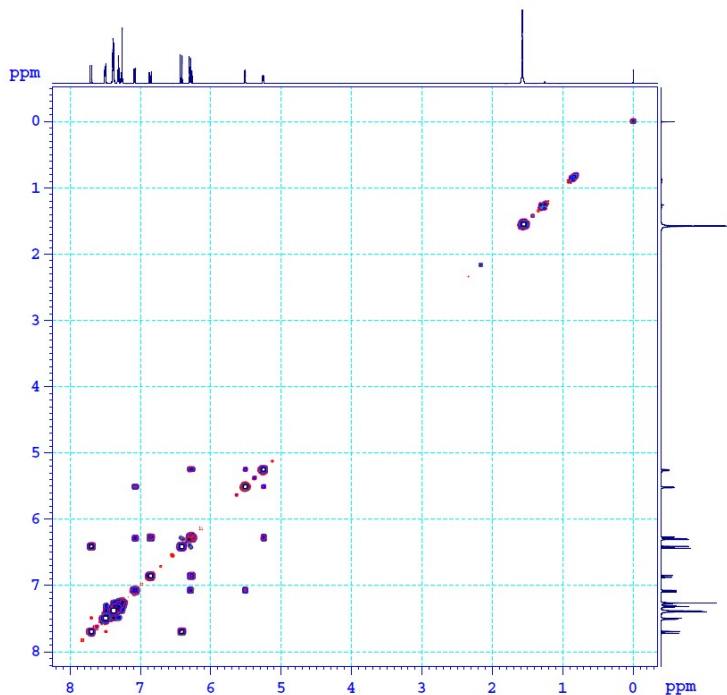

```

Current Data Parameters
NAME      110LINH_GE20
EXPNO    7
PROCNO   1

F2 - Acquisition Parameters
Date_    20220726
Time     11:16 h
INSTRUM  AvanceBO 600MHz
PROBHD   Z114607_0862 (
PULPROG  cosygpqpgf
TD       2048
SOLVENT  CDC13
NS       4
DS       8
SWH      9090.909 Hz
FIDRES   8.977641 Hz
AQ       0.1126400 sec
RG       101
AQ       55.000 usec
DE       6.50 usec
TE       303.2 K
D0       0.00000300 sec
D1       0.77881569 sec
D11      0.00000000 sec
D12      0.00002000 sec
D13      0.00004000 sec
D14      0.00020000 sec
IN0      0.00011000 sec
SPARSELI 0
TDav     1
SFO1     600.4042028 MHz
NUC1     1H
P0       10.50 usec
P1       10.50 usec
P17      2500.00 usec
PLW1     27.03700666 W
PLW10    4.76929998 W
CPDPRM(1) SWSQ10 100
CPZ1     10.00 %
P16     1000.00 usec

***** F1 INDIRECT DIMENSION *****
td1      160
sw_F1    15.141288

F1 - Acquisition parameters
TD       80
SFO1     600.4042 MHz
FIDRES   227.272720 Hz
SW       15.141 ppm
PnMODE   QF

F2 - Processing parameters
SI       1024
SF       600.4002462 MHz
WDW      QSLINE
SSB      0
LB       0 Hz
GB       0
PC       1.40

F1 - Processing parameters
SI       1024
MC2      QF
SF       600.4002462 MHz
WDW      QSLINE
SSB      0
LB       0 Hz
GB       0
    
```

GE20 - CDC13 - COSYGP

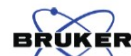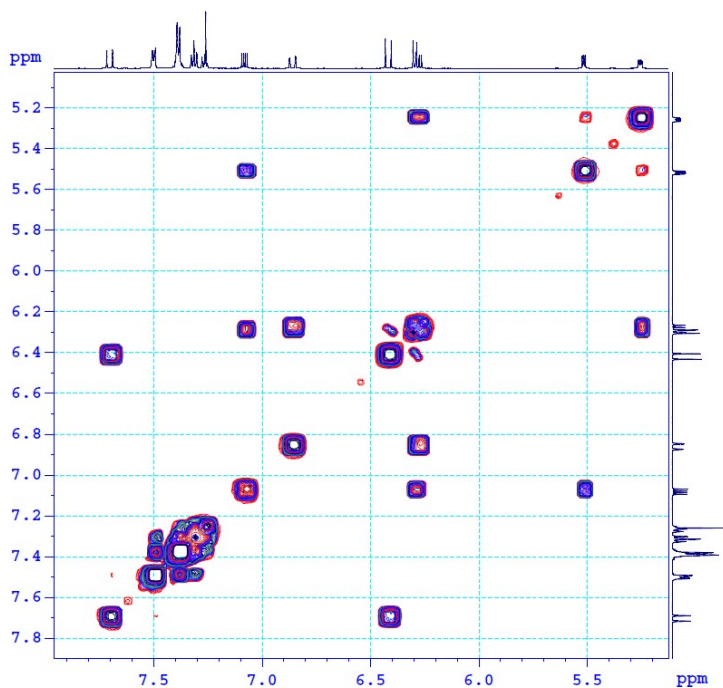

```

Current Data Parameters
NAME      110LINH_GE20
EXPNO    7
PROCNO   1

F2 - Acquisition Parameters
Date_    20220726
Time     11:16 h
INSTRUM  AvanceBO 600MHz
PROBHD   Z114607_0862 (
PULPROG  cosygpqpgf
TD       2048
SOLVENT  CDC13
NS       4
DS       8
SWH      9090.909 Hz
FIDRES   8.977641 Hz
AQ       0.1126400 sec
RG       101
AQ       55.000 usec
DE       6.50 usec
TE       303.2 K
D0       0.00000300 sec
D1       0.77881569 sec
D11      0.00000000 sec
D12      0.00002000 sec
D13      0.00004000 sec
D14      0.00020000 sec
IN0      0.00011000 sec
SPARSELI 0
TDav     1
SFO1     600.4042028 MHz
NUC1     1H
P0       10.50 usec
P1       10.50 usec
P17      2500.00 usec
PLW1     27.03700666 W
PLW10    4.76929998 W
CPDPRM(1) SWSQ10 100
CPZ1     10.00 %
P16     1000.00 usec

***** F1 INDIRECT DIMENSION *****
td1      160
sw_F1    15.141288

F1 - Acquisition parameters
TD       80
SFO1     600.4042 MHz
FIDRES   227.272720 Hz
SW       15.141 ppm
PnMODE   QF

F2 - Processing parameters
SI       1024
SF       600.4002462 MHz
WDW      QSLINE
SSB      0
LB       0 Hz
GB       0
PC       1.40

F1 - Processing parameters
SI       1024
MC2      QF
SF       600.4002462 MHz
WDW      QSLINE
SSB      0
LB       0 Hz
GB       0
    
```

S13. COSY- NMR spectrum of compound 1

GE20-CDC13-HMBC

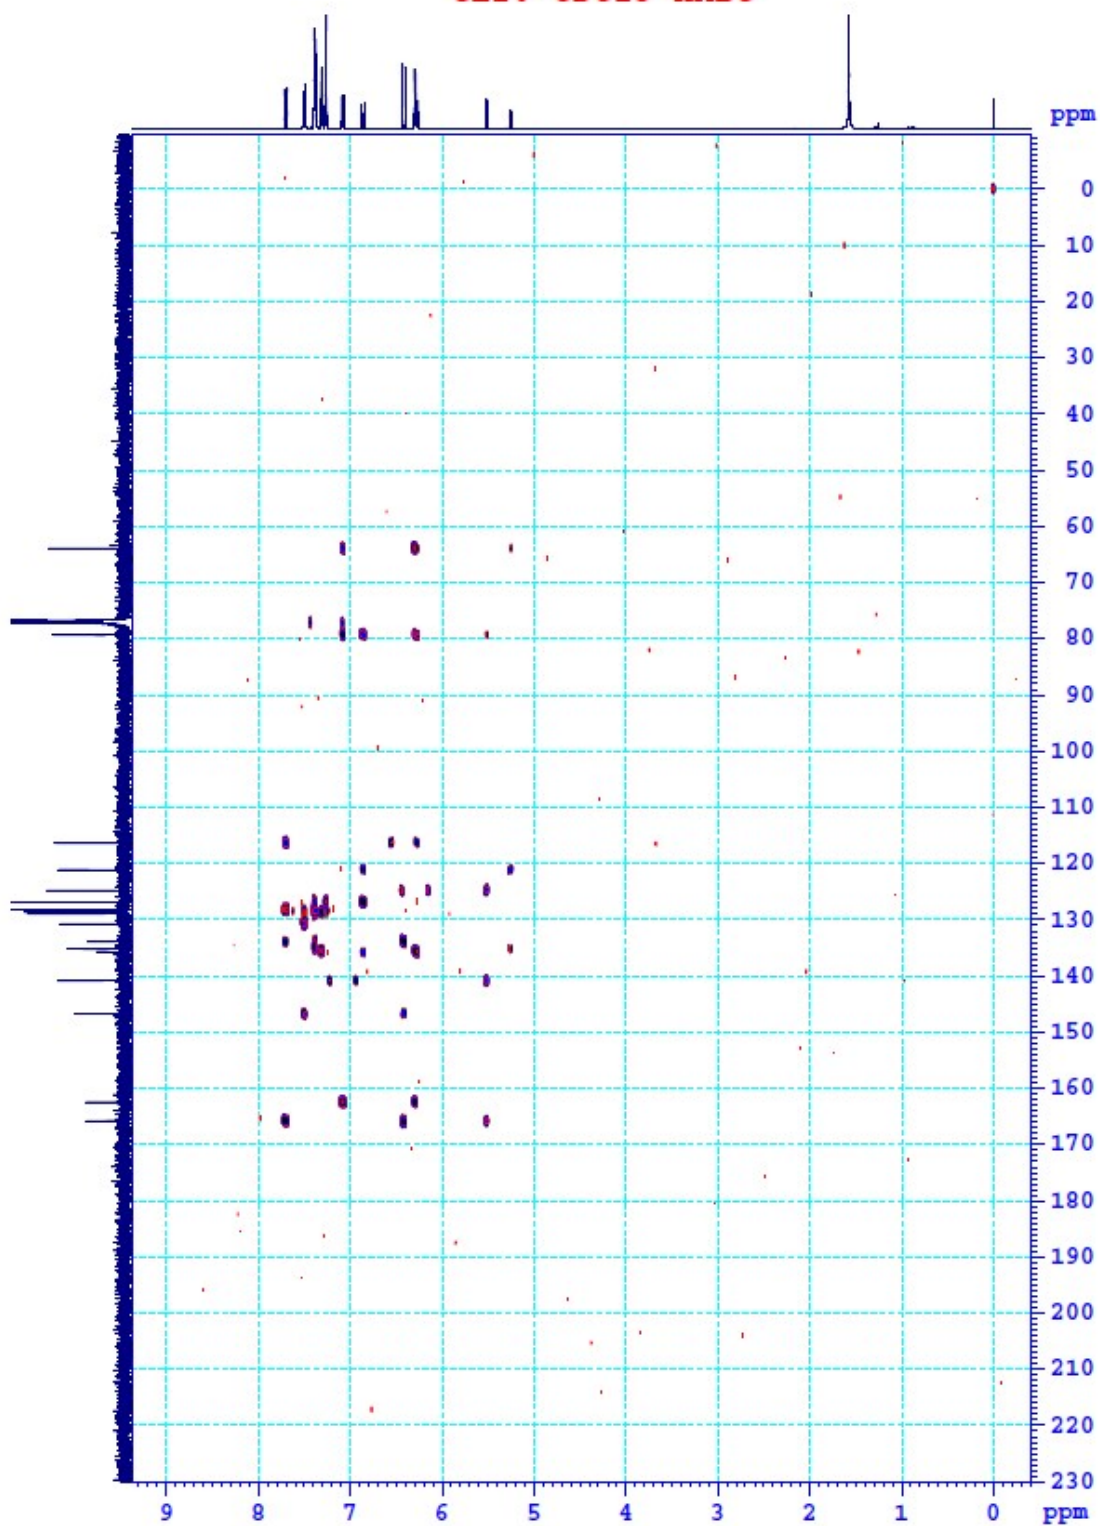

S14. HMBC - NMR spectrum of compound 1



GE20 - CDC13 - HMBC

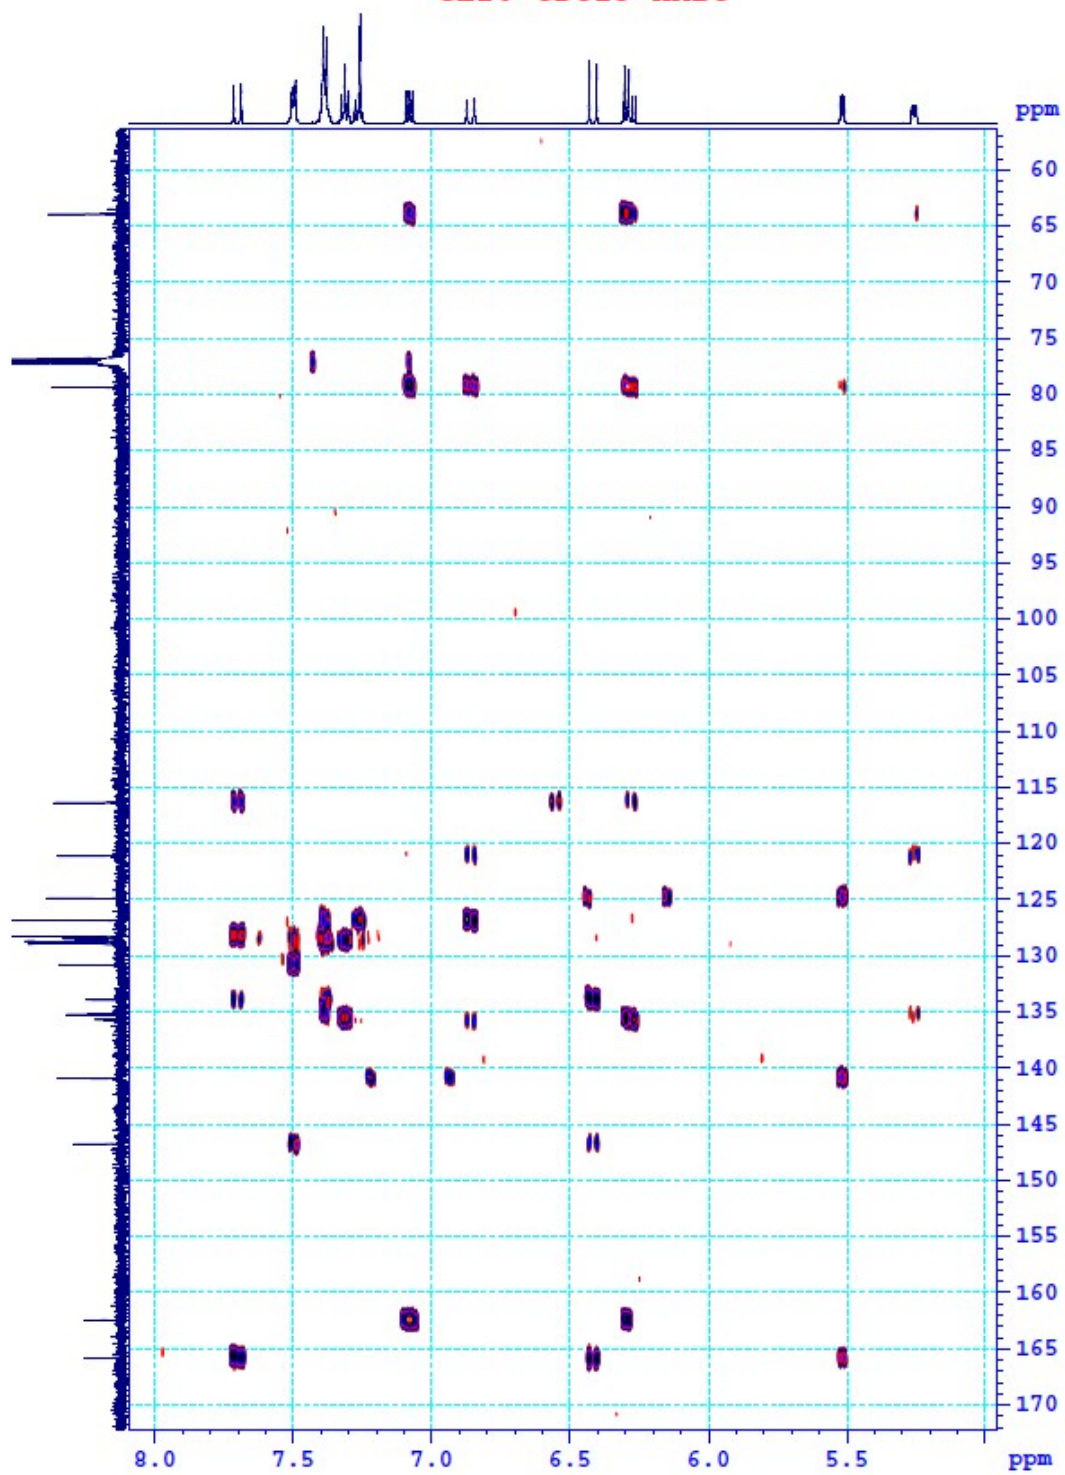

S15. HMBC - NMR spectrum of compound 1

GE20-CDC13-HMBC

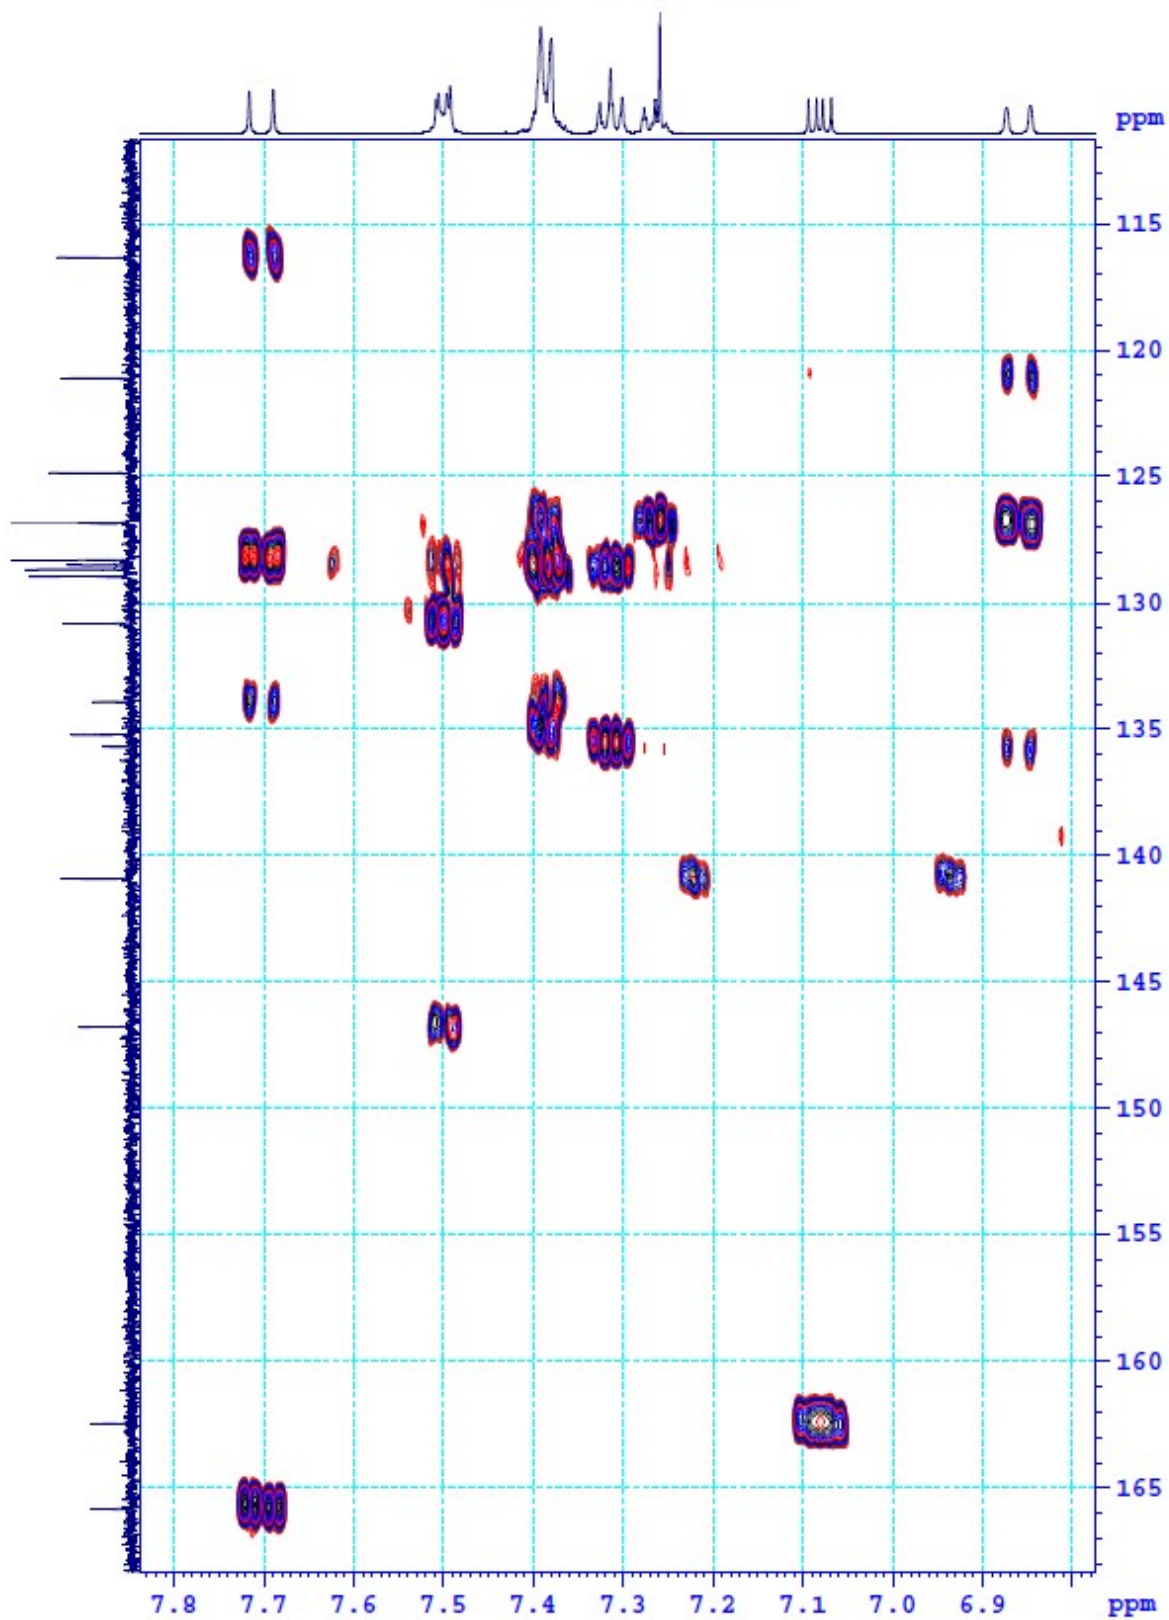

S16. HMBC - NMR spectrum of compound 1

GE20 - CDC13 - HMBC

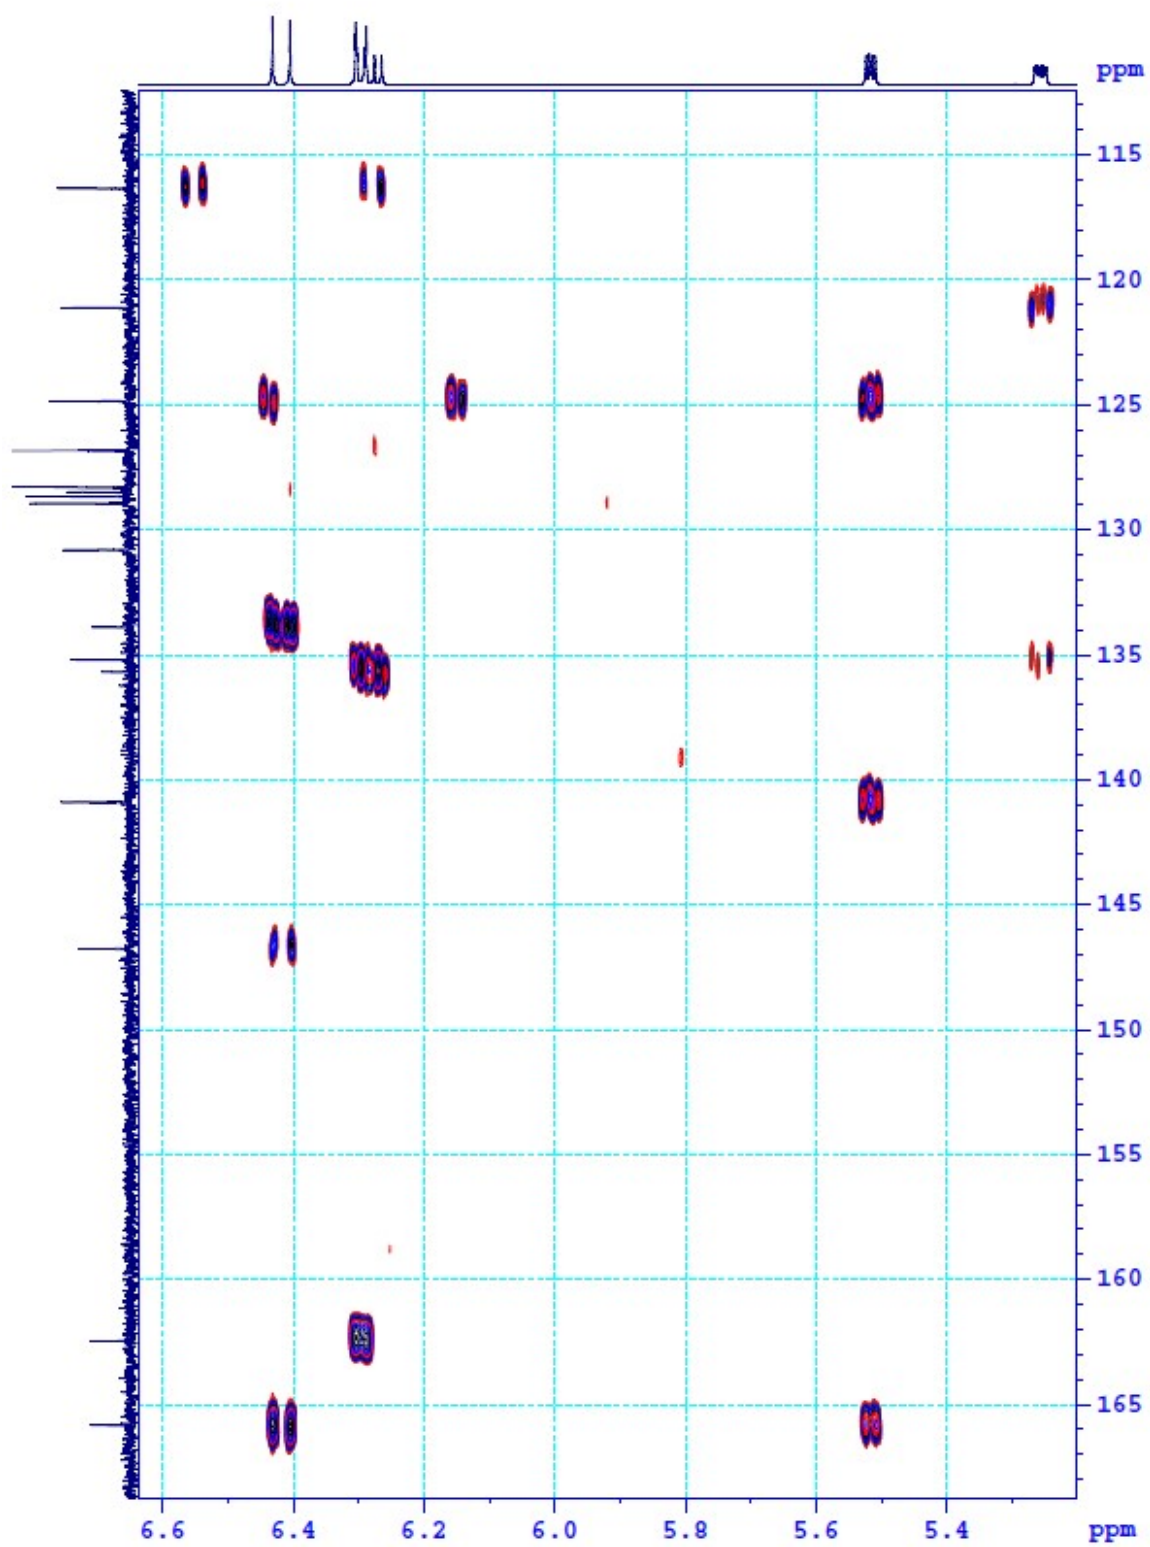

S17. HMBC - NMR spectrum of compound 1

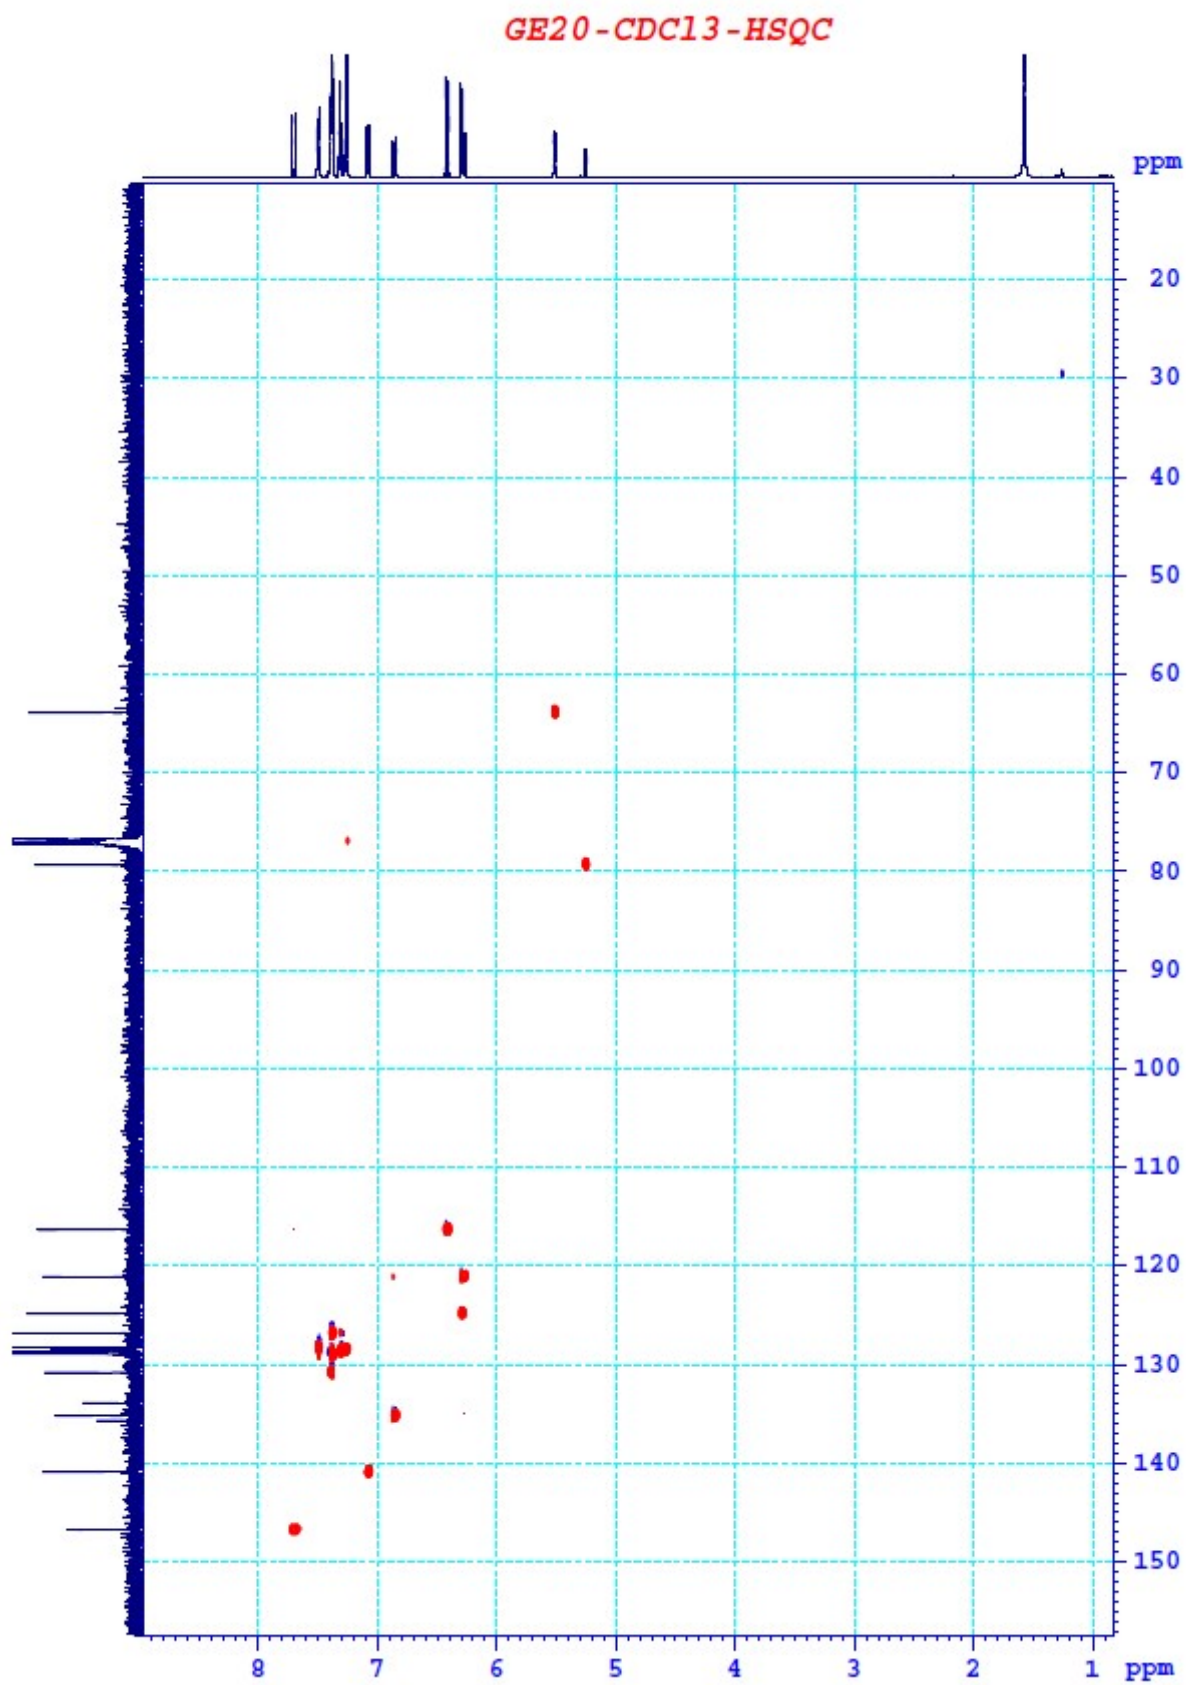

S18. HSQC - NMR spectrum of compound 1

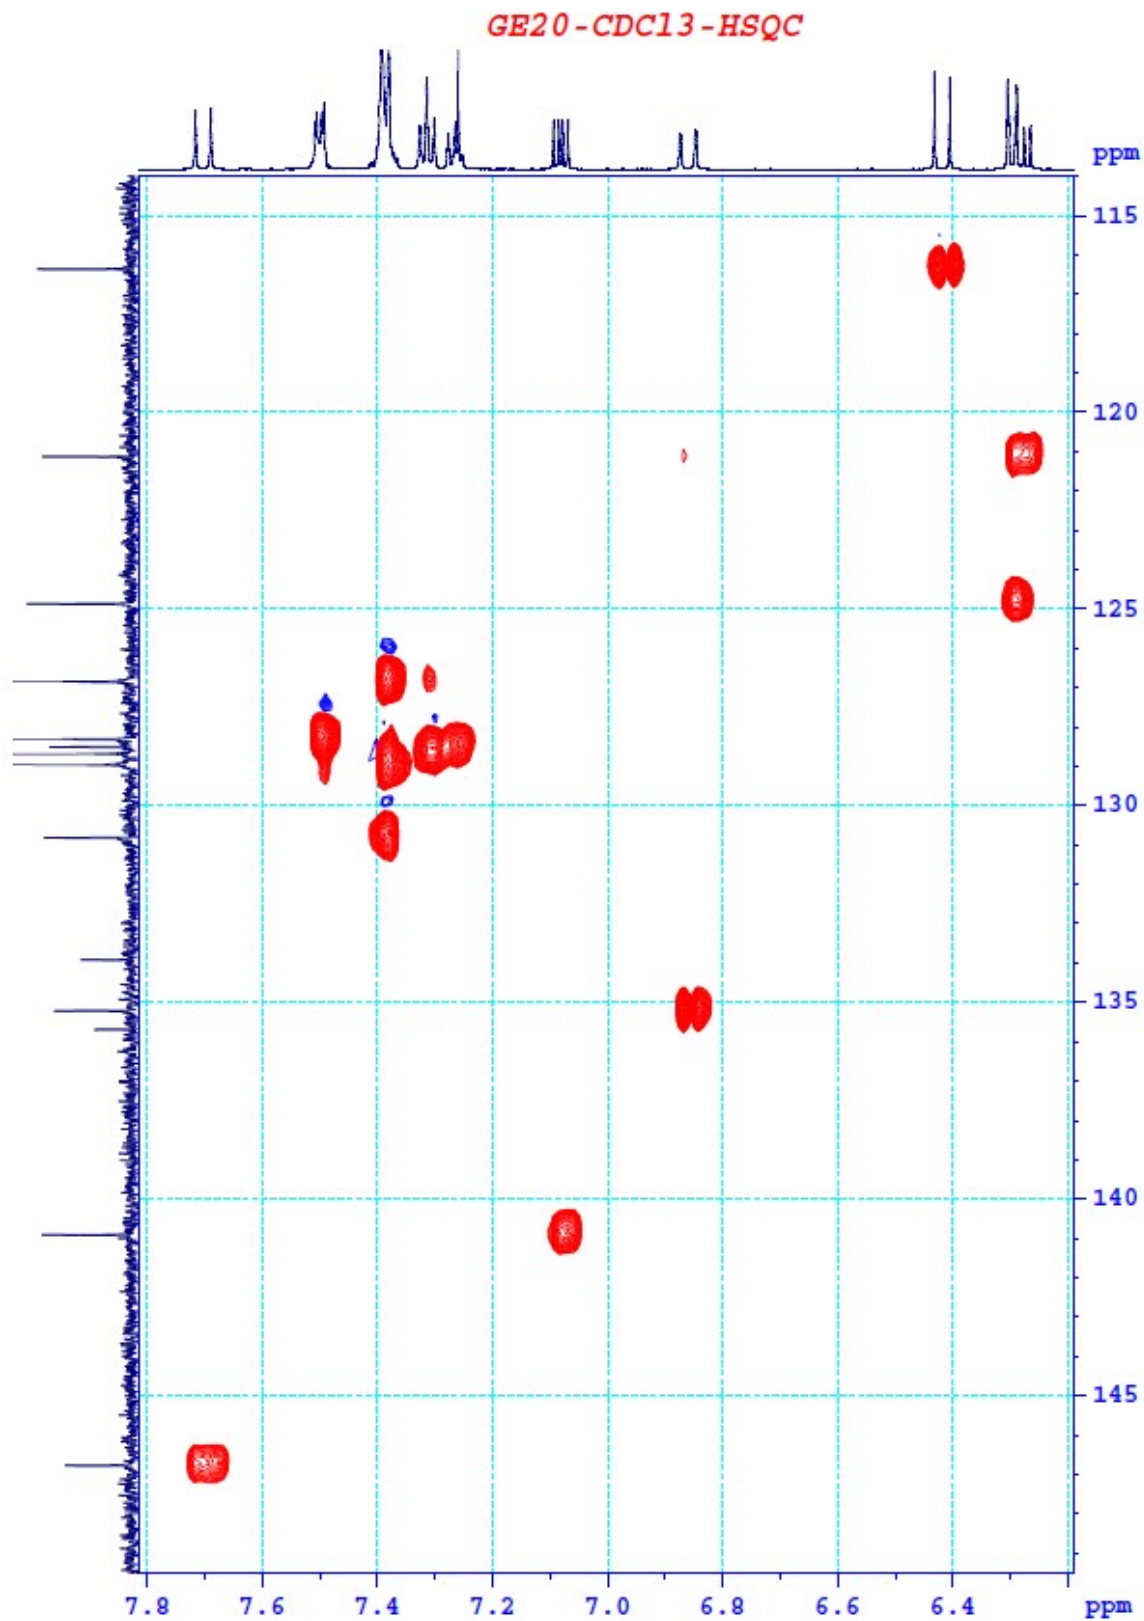

S19. HSQC - NMR spectrum of compound 1

GE20 - CDCl3 - NOESY

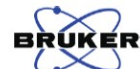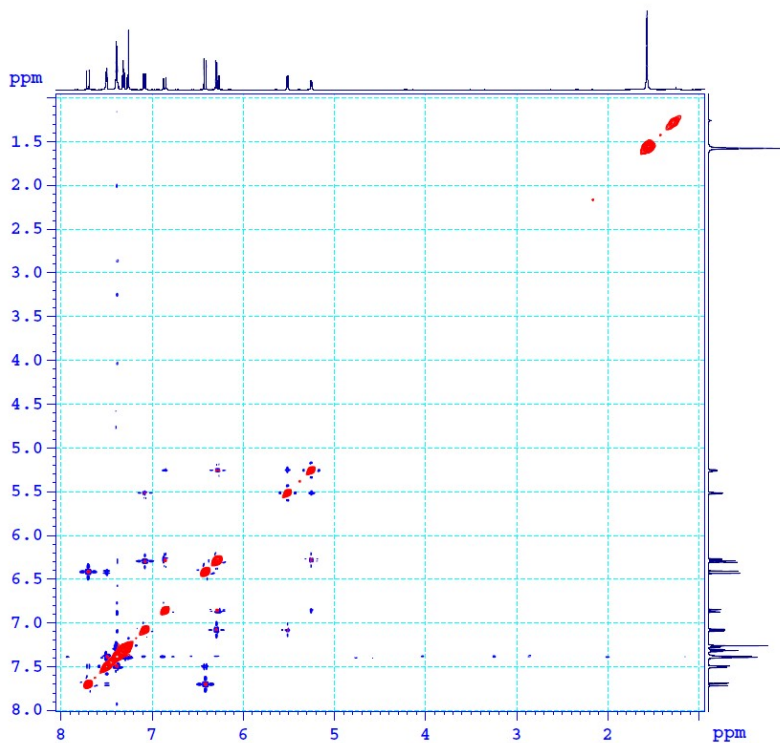

```

Current Data Parameters
NAME      110LINH_GE20
EXPNO    8
PROCNO   1

F2 - Acquisition Parameters
Date_    20220726
Time     12.22 h
INSTRUM  AvanceNeo 600MHz
PROBHD   E114607_0862 (
PULPROG  noesyzgpgpp
TD        2048
SOLVENT  CDCl3
NS        4
DS        32
SWH       5263.158 Hz
FIDRES    5.139802 Hz
AQ        0.1945600 sec
RG        181
DW        95.000 usec
DE        17.07 usec
TE        303.2 K
D0        0.0008163 sec
D1        1.97542405 sec
D8        0.30000001 sec
D11       0.03000000 sec
D12       0.00002000 sec
D16       0.00020000 sec
IN0       0.00019000 sec
TDav      1
SFO1      600.4025921 MHz
NUC1      1H
P1        10.50 usec
P2        21.00 usec
P17       2500.00 usec
PLW1      27.03700066 W
PLW10     4.75323998 W
GPNAM[1]  SMO10_100
GPZ1      40.00 %
P16       1000.00 usec

***** F1 INDIRECT DIMENSION *****
cd1       256
sw_F1     8.766048

F1 - Acquisition parameters
TD        256
SFO1      600.4026 MHz
FIDRES    41.118420 Hz
SW        8.766 ppm
F0MODE    States-TPPI

F2 - Processing parameters
SI         1024
SF         600.4000152 MHz
WDW        QSINE
SSB        2
LB         0 Hz
GB         0
PC         1.00

F1 - Processing parameters
SI         1024
MC2       States-TPPI
SF         600.4000152 MHz
WDW        QSINE
SSB        2
LB         0 Hz
GB         0
    
```

GE20 - CDCl3 - NOESY

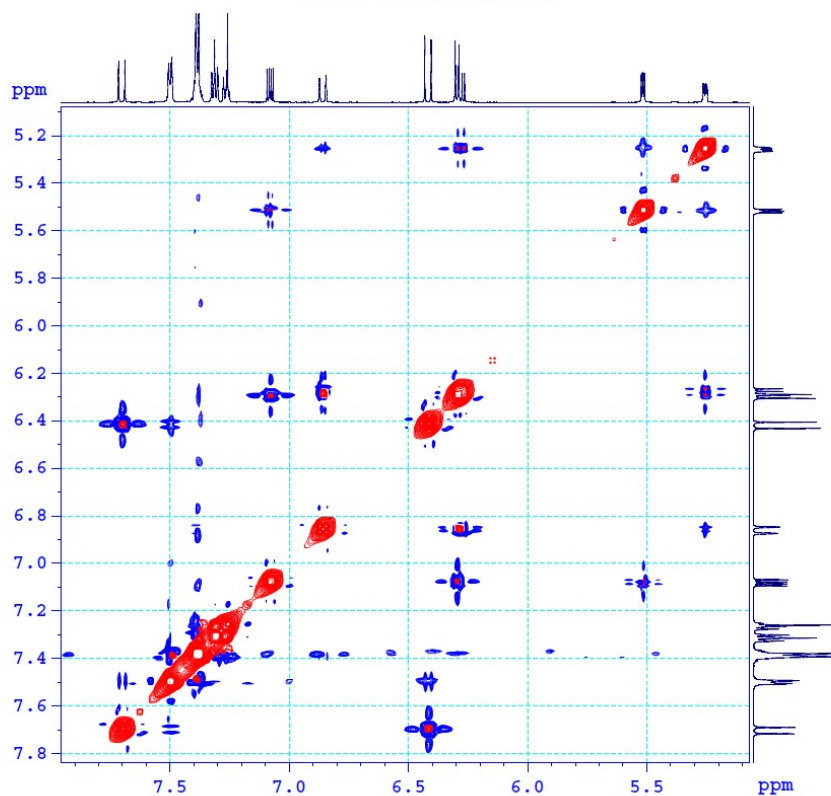

S20. NOESY - NMR spectrum of compound 1

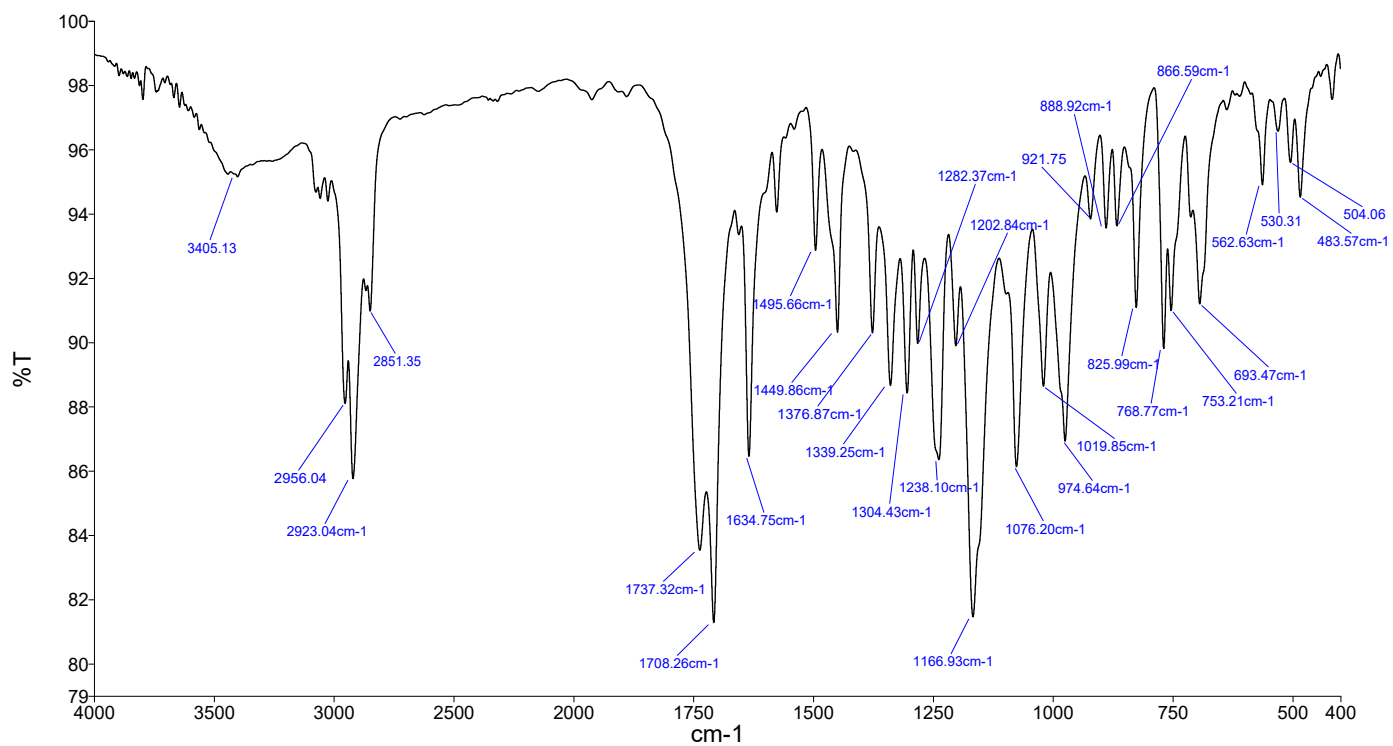

S21. IR spectrum of compound 1
